# Supplementary material
Source: ML conference proceedings conference paper supplement (https://openreview.net/forum?id=q9WMXjUxxT)
Supplement: supplementary_material [file attachment]

---

# Supplementary Material for Trust Region-Based Safe Distributional Reinforcement Learning for Multiple Constraints

---

Anonymous Author(s)

Affiliation

Address

email

1 In this supplementary material, we present proofs of theorems in the main text, detailed explanations  
2 of the experiments, and additional experimental results. First, Section A shows algorithm details,  
3 including proofs of theorems, toy examples, and pseudocode. In particular, Section A.6-8 present  
4 additional differences from the existing trust region-based safe RL algorithms. Section B describes  
5 the detail of the experimental settings. Section C shows experimental results, including additional  
6 ablation experiments. Then, the proposed algorithm is compared with the state-of-the-art traditional  
7 RL algorithm in Section D. The traditional RL algorithm is trained with various sets of reward  
8 weights, but SDAC shows the highest reward sums among them. These experiments exhibit the  
9 challenge of reward tuning when using traditional RL algorithms to perform the locomotion tasks.  
10 Finally, Section E presents the computational analysis of the gradient integration method. The table  
11 of contents is listed in Table 1.

Table 1: Table of Contents.

|                                          |                                                                                                                                                                                                                                                                                                     |
|------------------------------------------|-----------------------------------------------------------------------------------------------------------------------------------------------------------------------------------------------------------------------------------------------------------------------------------------------------|
| Section A: Algorithm Details             | A.1. Proof of Theorem 3.1<br>A.2. Toy example for Gradient Integration Method<br>A.3 Proof of Theorem 3.2<br>A.4 Pseudocode of TD( $\lambda$ ) Target Distribution<br>A.6 Policy Update Rule<br>A.7 Bound of Entropy-Augmented Objective<br>A.8 Comparison of Q and Value Function-Based Surrogates |
| Section B: Experimental Settings         |                                                                                                                                                                                                                                                                                                     |
| Section C: Experimental Results          | C.1 Safety Gym<br>C.2 Ablation Study on Components of SDAC<br>C.3 Ablation Study on Hyperparameters                                                                                                                                                                                                 |
| Section D: Comparison with RL Algorithms |                                                                                                                                                                                                                                                                                                     |
| Section E: Computational Cost Analysis   | E.1 Complexity of Gradient Integration Method<br>E.2 Quantitative Analysis                                                                                                                                                                                                                          |

## 12 A Algorithm Details

### 13 A.1 Proof of Theorem 3.1

14 We denote the policy parameter space as  $\Psi \subseteq \mathbb{R}^d$ , the parameter at the  $t$ th iteration as  $\psi_t \in \Psi$ ,  
 15 the Hessian matrix as  $H(\psi_t) = \nabla_{\psi}^2 D_{\text{KL}}(\pi_{\psi_t} || \pi_{\psi})|_{\psi=\psi_t}$ , and the  $k$ th cost surrogate as  $F_k(\psi_t) =$   
 16  $F_k^{\mu, \pi}(\pi_{\psi_t}; \alpha)$ . As we focus on the  $t$ th iteration, the following notations are used for brevity:  $H =$   
 17  $H(\psi_t)$  and  $g_k = \nabla F_k(\psi_t)$ . The proposed gradient integration at  $t$ th iteration is defined as the  
 18 following quadratic program (QP):

$$g_t = \underset{g}{\operatorname{argmin}} \frac{1}{2} g^T H g \quad \text{s.t. } g_k^T g + c_k \leq 0 \text{ for } \forall k, \quad (1)$$

19 where  $c_k = \min(\sqrt{2\epsilon g_k^T H^{-1} g_k}, F_k(\pi_{\psi}; \alpha) - d_k + \zeta)$ . In the remainder of this section, we introduce  
 20 the assumptions and new definitions, discuss the existence of a solution (1), show the convergence to  
 21 the feasibility condition for varying step size cases, and provide the proof of Theorem 3.1.

22 **Assumption. 1)** Each  $F_k$  is differentiable and convex, **2)**  $\nabla F_k$  is  $L$ -Lipschitz continuous, **3)** all  
 23 eigenvalues of the Hessian matrix  $H(\psi)$  are equal or greater than  $R \in \mathbb{R}_{>0}$  for  $\forall \psi \in \Psi$ , and **4)**  
 24  $\{\psi | F_k(\psi) + \zeta < d_k \text{ for } \forall k\} \neq \emptyset$ .

25 **Definition.** Using the Cholesky decomposition, the Hessian matrix can be expressed as  $H = B \cdot B^T$   
 26 where  $B$  is a lower triangular matrix. By introducing new terms,  $\bar{g}_k := B^{-1} g_k$  and  $b_t := B^T g_t$ , the  
 27 following is satisfied:  $g_k^T H^{-1} g_k = \|\bar{g}_k\|_2^2$ . Additionally, we define the in-boundary and out-boundary  
 28 sets as:

$$\begin{aligned} \text{IB}_k &:= \left\{ \psi | F_k(\psi) - d_k + \zeta \leq \sqrt{2\epsilon \nabla F_k(\psi)^T H^{-1}(\psi) \nabla F_k(\psi)} \right\}, \\ \text{OB}_k &:= \left\{ \psi | F_k(\psi) - d_k + \zeta \geq \sqrt{2\epsilon \nabla F_k(\psi)^T H^{-1}(\psi) \nabla F_k(\psi)} \right\}. \end{aligned}$$

29 The minimum of  $\|\bar{g}_k\|$  in  $\text{OB}_k$  is denoted as  $m_k$ , and the maximum of  $\|\bar{g}_k\|$  in  $\text{IB}_k$  is denoted as  
 30  $M_k$ . Also,  $\min_k m_k$  and  $\max_k M_k$  are denoted as  $m$  and  $M$ , respectively, and we can say that  $m$  is  
 31 positive.

32 **Lemma A.1.** *For all  $k$ , the minimum value of  $m_k$  is positive.*

33 *Proof.* Assume that there exist  $k \in \{1, \dots, K\}$  such that  $m_k$  is equal to zero at a policy parameter  
 34  $\psi^* \in \text{OB}_k$ , i.e.,  $\|\nabla F_k(\psi^*)\| = 0$ . Since  $F_k$  is convex,  $\psi^*$  is a minimum point of  $F_k$ ,  $\min_{\psi} F_k(\psi) =$   
 35  $F_k(\psi^*) < d_k - \zeta$ . However,  $F_k(\psi^*) \geq d_k - \zeta$  as  $\psi^* \in \text{OB}_k$ , so  $m_k$  is positive due to the  
 36 contradiction. Hence, the minimum of  $m_k$  is also positive.  $\square$

37 **Lemma A.2.** *A solution of (1) always exists.*

38 *Proof.* There exists a policy parameter  $\hat{\psi} \in \{\psi | F_k(\psi) + \zeta < d_k \text{ for } \forall k\}$  due to the assumptions.  
 39 Let  $g = \psi - \psi_t$ . Then, the following inequality holds.

$$\begin{aligned} g_k^T(\psi - \psi_t) + c_k &\leq g_k^T(\psi - \psi_t) + F_k(\psi_t) + \zeta - d_k \leq F_k(\psi) + \zeta - d_k. \quad (\because F_k \text{ is convex.}) \\ \Rightarrow g_k^T(\hat{\psi} - \psi_t) + c_k &\leq F_k(\hat{\psi}) + \zeta - d_k < 0 \text{ for } \forall k. \end{aligned}$$

40 Since  $\hat{\psi} - \psi_t$  satisfies all constraints of (1), the feasible set is non-empty and convex. Also,  $H$  is  
 41 positive definite, so the QP has a unique solution.  $\square$

42 Lemma A.2 shows the existence of solution of (1). We introduce a new lemma, which shows  $\|b_t\|$  is  
 43 bounded by  $\sqrt{\epsilon}$ .

44 **Lemma A.3.** *There exists  $T \in \mathbb{R}_{>0}$  such that  $\|b_t\| \leq T\sqrt{\epsilon}$ .*

45 *Proof.* By solving the dual problem of (1),  $g_t$  can be expressed as:

$$g_t = - \sum_{k=1}^K \lambda_k H^{-1} g_k \text{ s.t. } \lambda_k = \max \left( \frac{c_k - \sum_{j \neq k} \lambda_j g_j^T H^{-1} g_k}{g_k^T H^{-1} g_k}, 0 \right) \text{ for } \forall k.$$

46 The following inequality holds for  $\forall k$ :

$$\lambda_k \leq \max \left( \frac{c_k}{\|\bar{g}_k\|^2}, 0 \right) \leq \max \left( \frac{\sqrt{2\epsilon}\|\bar{g}_k\|}{\|\bar{g}_k\|^2}, 0 \right) \leq \frac{\sqrt{2\epsilon}}{\|\bar{g}_k\|}.$$

47 Using triangular inequality,

$$\begin{aligned} \|b_t\| &= \|B^T g_t\| = \left\| \sum_k \lambda_k B^T H^{-1} g_k \right\| \leq \sum_k \lambda_k \|B^T H^{-1} g_k\| \\ &\leq \sqrt{2\epsilon} \sum_k \frac{\|B^T H^{-1} g_k\|}{\|\bar{g}_k\|} = K\sqrt{2\epsilon}. \end{aligned}$$

48 Hence, for every constant  $T > \sqrt{2}K$ , the statement holds.  $\square$

49 Now, we show the convergence of the proposed gradient integration method in the case of varying  
50 step sizes.

51 **Lemma A.4.** Suppose the following constants  $\kappa_1, \kappa_2$  are given:  $0 < \kappa_1 < \frac{\sqrt{2}mR\kappa_2}{LK^2\sqrt{\epsilon}}$  and  $0 < \kappa_2 < 1$ .  
52 If  $\sqrt{2\epsilon}M \leq \zeta$  and a policy is updated by  $\psi_{t+1} = \psi_t + \beta_t g_t$ , where  $\kappa_1 \leq \beta_t \leq \frac{2\sqrt{2\epsilon}mR}{L\|\bar{b}_t\|^2} \kappa_2$ , the policy  
53 satisfies  $F_k(\psi) \leq d_k$  for  $\forall k$  within a finite time.

54 *Proof.* We can reformulate the step size as  $\beta_t = \frac{2\sqrt{2\epsilon}mR}{L\|\bar{b}_t\|^2} \beta'_t$ , where  $\frac{L\|\bar{b}_t\|^2}{2\sqrt{2\epsilon}mR} \kappa_1 \leq \beta'_t \leq \kappa_2$ . Since the  
55 eigenvalues of  $H$  is equal to or bigger than  $R$  and  $H$  is symmetric and positive definite,  $\frac{1}{R}I - H^{-1}$   
56 is positive semi-definite. Hence,  $x^T H^{-1} x \leq \frac{1}{R} \|x\|^2$  is satisfied. Using this fact, the following  
57 inequality holds:

$$\begin{aligned} F_k(\psi_t + \beta_t g_t) - F_k(\psi_t) &\leq \beta_t \nabla F_k(\psi_t)^T g_t + \frac{L}{2} \|\beta_t g_t\|^2 \quad (\because \nabla F_k \text{ is } L\text{-Lipschitz continuous.}) \\ &= \beta_t g_t^T g_t + \frac{L}{2} \beta_t^2 \|g_t\|^2 \\ &= \beta_t g_t^T g_t + \frac{L}{2} \beta_t^2 b_t^T H^{-1} b_t \quad (\because g_t = B^{-T} b_t) \\ &\leq -\beta_t c_k + \frac{L}{2R} \beta_t^2 \|b_t\|^2. \quad (\because g_t^T g_t + c_k \leq 0) \end{aligned}$$

58 Now, we will show that  $\psi$  enters  $\text{IB}_k$  in a finite time for  $\forall \psi \in \text{OB}_k$  and that the  $k$ th constraint is  
59 satisfied for  $\forall \psi \in \text{IB}_k$ . Thus, we divide into two cases, **1)**  $\psi_t \in \text{OB}_k$  and **2)**  $\psi_t \in \text{IB}_k$ . For the first  
60 case,  $c_k = \sqrt{2\epsilon}\|\bar{g}_k\|$ , so the following inequality holds:

$$\begin{aligned} F_k(\psi_t + \beta_t g_t) - F_k(\psi_t) &\leq \beta_t \left( -\sqrt{2\epsilon}\|\bar{g}_k\| + \frac{L}{2R} \beta_t \|b_t\|^2 \right) \\ &\leq \beta_t \sqrt{2\epsilon} (-\|\bar{g}_k\| + m\beta'_t) \\ &\leq \beta_t \sqrt{2\epsilon} m (\beta'_t - 1) \leq \kappa_1 (\kappa_2 - 1) \sqrt{2\epsilon} m < 0. \end{aligned} \tag{2}$$

61 The value of  $F_k$  decreases strictly with each update step according to (2). Hence,  $\psi_t$  can reach  $\text{IB}_k$   
62 by repeatedly updating the policy. We now check whether the constraint is satisfied for the second  
63 case. For the second case, the following inequality holds by applying  $c_k = F_k(\psi_t) - d_k + \zeta$ :

$$\begin{aligned} F_k(\psi_t + \beta_t g_t) - F_k(\psi_t) &\leq \beta_t d_k - \beta_t F_k(\psi_t) - \beta_t \zeta + \frac{L}{2R} \beta_t^2 \|b_t\|^2 \\ \Rightarrow F_k(\psi_t + \beta_t g_t) - d_k &\leq (1 - \beta_t)(F_k(\psi_t) - d_k) + \beta_t(-\zeta + \sqrt{2\epsilon}m\beta'_t). \end{aligned}$$

64 Since  $\psi_t \in \text{IB}_k$ ,

$$F_k(\psi_t) - d_k \leq \sqrt{2\epsilon}\|\bar{g}_k\| - \zeta \leq \sqrt{2\epsilon}M - \zeta \leq 0.$$

65 Since  $m \leq M$  and  $\beta'_t < 1$ ,

$$-\zeta + \sqrt{2\epsilon}m\beta'_t < -\zeta + \sqrt{2\epsilon}M \leq 0.$$

66 Hence,  $F_k(\psi_t + \beta_t g_t) \leq d_k$ , which means that the  $k$ th constraint is satisfied if  $\psi_t \in \text{IB}_k$ . As  $\psi_t$   
67 reaches  $\text{IB}_k$  for  $\forall k$  within a finite time according to (2), the policy can satisfy all constraints within a  
68 finite time.  $\square$

Lemma A.4 shows the convergence to the feasibility condition in the case of varying step sizes. We finally show the proof of Theorem 3.1, which can be considered a special case of varying step sizes.

**Theorem 3.1.** Assume that the cost surrogates are differentiable and convex, gradients of the surrogates are  $L$ -Lipschitz continuous, eigenvalues of the Hessian are equal or greater than a positive value  $R \in \mathbb{R}_{>0}$ , and  $\{\psi|F_k(\pi_\psi; \alpha) + \zeta < d_k, \forall k\} \neq \emptyset$ . Then, there exists  $E \in \mathbb{R}_{>0}$  such that if  $0 < \epsilon \leq E$  and a policy is updated by the proposed gradient integration method, all constraints are satisfied within finite time steps.

*Proof.* The proposed step size is  $\beta_t = \min(1, \sqrt{2\epsilon}/\|b_t\|)$ , and the sufficient conditions that guarantee the convergence according to Lemma A.4 are followings:

$$\sqrt{2\epsilon}M \leq \zeta, \text{ and } \kappa_1 \leq \beta_t \leq \frac{2\sqrt{2\epsilon}mR}{L\|b_t\|^2} \kappa_2 \text{ for } \exists \kappa_1, \kappa_2.$$

From the first condition,  $\epsilon \leq \zeta^2/(2M^2)$ . To satisfy the second condition, the proposed step size  $\beta_t$  should satisfy the followings:

$$\beta_t \leq \frac{\sqrt{2\epsilon}}{\|b_t\|} \leq \frac{2\sqrt{2\epsilon}mR}{L\|b_t\|^2} \kappa_2 \Leftrightarrow \|b_t\| \leq \frac{2mR}{L} \kappa_2.$$

If  $\epsilon \leq 2((mR\kappa_2)/(LK))^2$ , the following inequality holds:

$$\sqrt{2\epsilon} \leq \frac{2mR}{LK} \kappa_2 \Rightarrow \|b_t\| \leq K\sqrt{2\epsilon} \leq \frac{2mR}{L} \kappa_2. \quad (\because \text{Lemma A.3.})$$

If  $1 \leq \sqrt{2\epsilon}/\|b_t\|^2$ , it is obvious that  $\kappa_1 < 1 = \beta_t$ . If  $1 > \sqrt{2\epsilon}/\|b_t\|$ , we can get the followings by setting  $\kappa_1 \leq 1/K$ :

$$\kappa_1 \leq \frac{1}{K} \leq \frac{\sqrt{2\epsilon}}{\|b_t\|} = \beta_t. \quad (3)$$

Hence, if  $\epsilon \leq E = \frac{1}{2} \min(\frac{\zeta^2}{2M^2}, 2(\frac{mR\kappa_2}{LK})^2)$ ,  $0 < \kappa_1 < \min(\frac{\sqrt{2mR\kappa_2}}{LK^2\sqrt{\epsilon}}, \frac{1}{K})$ , and  $0 < \kappa_2 < 1$ , the sufficient conditions are satisfied.  $\square$

## A.2 Toy Example for Gradient Integration Method

The problem of the toy example in Figure 1 in the main paper is defined as:

$$\underset{x_1, x_2}{\text{minimize}} \sqrt{(\sqrt{3}x_1 + x_2 + 2)^2 + 4(x_1 - \sqrt{3}x_2 + 4)^2} \quad \text{s.t. } x_1 \geq 0, x_1 - 2x_2 \leq 0, \quad (4)$$

where there are two linear constraints. The initial points for the naive and gradient integration methods are  $x_1 = -2.5$  and  $x_2 = -3.0$ , which do not satisfied the two constraints. We use the Hessian matrix for the trust region as identity matrix and the trust region size as 0.5 in both methods. The naive method minimizes the constraints in order from the first to the second constraint.

### 91 A.3 Proof of Theorem 3.2

92 In this section, we show that a sequence,  $Z_{k+1} = \mathcal{T}_\lambda^{\mu, \pi} Z_k$ , converges to the  $Z_R^\pi$ . First, we rewrite  
 93 the operator  $\mathcal{T}_\lambda^{\mu, \pi}$  for random variables to an operator for distributions and show that the operator is  
 94 contractive. Finally, we show that  $Z_R^\pi$  is the unique fixed point.

95 Before starting the proof, we introduce useful notions and distance metrics. As the return  $Z_R^\pi(s, a)$   
 96 is a random variable, we define the distribution of  $Z_R^\pi(s, a)$  as  $\nu_R^\pi(s, a)$ . Let  $\eta$  be the distribution  
 97 of a random variable  $X$ . Then, we can express the distribution of affine transformation of random  
 98 variable,  $aX + b$ , using the *pushforward* operator, which is defined by Rowland et al. [2018], as  
 99  $(f_{a,b})_\#(\eta)$ . To measure a distance between two distributions, Bellemare et al. [2023] has defined the  
 100 distance  $l_p$  as follows:

$$l_p(\eta_1, \eta_2) := \left( \int_{\mathbb{R}} |F_{\eta_1}(x) - F_{\eta_2}(x)|^p dx \right)^{1/p}, \quad (5)$$

101 where  $F_\eta(x)$  is the cumulative distribution function. This distance is  $1/p$ -homogeneous, regular,  
 102 and  $p$ -convex (see Section 4 of Bellemare et al. [2023] for more details). For functions that map  
 103 state-action pairs to distributions, a distance can be defined as [Bellemare et al., 2023]:  $\bar{l}_p(\nu_1, \nu_2) :=$   
 104  $\sup_{(s,a) \in S \times A} l_p(\nu_1(s, a), \nu_2(s, a))$ . Then, we can rewrite the operator  $\mathcal{T}_\lambda^{\mu, \pi}$  for random variables in  
 105 (10) as an operator for distributions as below.

$$\begin{aligned} \mathcal{T}_\lambda^{\mu, \pi} \nu(s, a) &:= \frac{1 - \lambda}{\mathcal{N}} \sum_{i=0}^{\infty} \lambda^i \\ &\times \mathbb{E}_\mu \left[ \left( \prod_{j=1}^i \eta(s_j, a_j) \right) \mathbb{E}_{a' \sim \pi(\cdot | s_{i+1})} \left[ (f_{\gamma^{i+1}, \sum_{t=0}^i \gamma^t r_t})_\#(\nu(s_{i+1}, a')) \right] \middle| s_0 = s, a_0 = a \right], \end{aligned} \quad (6)$$

106 where  $\eta(s, a) = \frac{\pi(a|s)}{\mu(a|s)}$  and  $\mathcal{N}$  is a normalization factor. Since the random variable  $Z(s, a)$  and the  
 107 distribution  $\nu(s, a)$  is equivalent, the operators in (10) and (6) are also equivalent. Hence, we are  
 108 going to show the proof of Theorem 3.2 using (6) instead of (10). We first show that the operator  
 109  $\mathcal{T}_\lambda^{\mu, \pi}$  has a contraction property.

110 **Lemma A.5.** *Under the distance  $\bar{l}_p$  and the assumption that the state, action, and reward spaces are*  
 111 *finite,  $\mathcal{T}_\lambda^{\mu, \pi}$  is  $\gamma^{1/p}$ -contractive.*

112 *Proof.* First, the operator can be rewritten using summation as follows.

$$\begin{aligned} \mathcal{T}_\lambda^{\mu, \pi} \nu(s, a) &= \frac{1 - \lambda}{\mathcal{N}} \sum_{i=0}^{\infty} \lambda^i \sum_{a' \in A} \sum_{(s_0, a_0, r_0, \dots, s_{i+1})} \underbrace{\Pr_\mu(s_0, a_0, r_0, \dots, s_{i+1})}_{=: \tau} \left( \prod_{j=1}^i \eta(s_j, a_j) \right) \\ &\times \pi(a' | s_{i+1}) (f_{\gamma^{i+1}, \sum_{t=0}^i \gamma^t r_t})_\#(\nu(s_{i+1}, a')) \\ &= \frac{1 - \lambda}{\mathcal{N}} \sum_{i=0}^{\infty} \lambda^i \sum_{a' \in A} \sum_{\tau} \Pr_\mu(\tau) \left( \prod_{j=1}^i \eta(s_j, a_j) \right) \pi(a' | s_{i+1}) \sum_{s' \in S} \mathbf{1}_{s'=s_{i+1}} \\ &\times \sum_{r'_{0:i}} \left( \prod_{k=0}^i \mathbf{1}_{r'_k=r_k} \right) (f_{\gamma^{i+1}, \sum_{t=0}^i \gamma^t r'_t})_\#(\nu(s', a')) \\ &= \frac{1 - \lambda}{\mathcal{N}} \sum_{i=0}^{\infty} \lambda^i \sum_{a' \in A} \sum_{s' \in S} \sum_{r'_{0:i}} (f_{\gamma^{i+1}, \sum_{t=0}^i \gamma^t r'_t})_\#(\nu(s', a')) \\ &\times \underbrace{\mathbb{E}_\mu \left[ \left( \prod_{j=1}^i \eta(s_j, a_j) \right) \pi(a' | s_{i+1}) \mathbf{1}_{s'=s_{i+1}} \left( \prod_{k=0}^i \mathbf{1}_{r'_k=r_k} \right) \right]}_{=: w_{s', a', r'_{0:i}}} \\ &= \frac{1 - \lambda}{\mathcal{N}} \sum_{i=0}^{\infty} \sum_{s' \in S} \sum_{a' \in A} \sum_{r'_{0:i}} \lambda^i w_{s', a', r'_{0:i}} (f_{\gamma^{i+1}, \sum_{t=0}^i \gamma^t r'_t})_\#(\nu(s', a')). \end{aligned} \quad (7)$$

113 Since the sum of weights of distributions should be one, we can find the normalization factor  
 114  $\mathcal{N} = (1 - \lambda) \sum_{i=0}^{\infty} \sum_{s \in S} \sum_{a \in A} \sum_{r_{0:i}} \lambda^i w_{s,a,r_{0:i}}$ . Then, the following inequality can be derived  
 115 using the homogeneity, regularity, and convexity of  $l_p$ :

$$\begin{aligned}
 & l_p^p(\mathcal{T}_\lambda^{\mu,\pi} \nu_1(s, a), \mathcal{T}_\lambda^{\mu,\pi} \nu_2(s, a)) \\
 &= l_p^p \left( \frac{1 - \lambda}{\mathcal{N}} \sum_{i=0}^{\infty} \sum_{s \in S} \sum_{a \in A} \sum_{r_{0:i}} \lambda^i w_{s,a,r_{0:i}} (f_{\gamma^{i+1}, \sum_{t=0}^i \gamma^t r_t})_{\#}(\nu_1(s, a)), \right. \\
 &\quad \left. \frac{1 - \lambda}{\mathcal{N}} \sum_{i=0}^{\infty} \sum_{s \in S} \sum_{a \in A} \sum_{r_{0:i}} \lambda^i w_{s,a,r_{0:i}} (f_{\gamma^{i+1}, \sum_{t=0}^i \gamma^t r_t})_{\#}(\nu_2(s, a)) \right) \\
 &\leq \sum_{i=0}^{\infty} \sum_{s \in S} \sum_{a \in A} \sum_{r_{0:i}} \frac{(1 - \lambda) \lambda^i w_{s,a,r_{0:i}}}{\mathcal{N}} l_p^p \left( (f_{\gamma^{i+1}, \sum_{t=0}^i \gamma^t r_t})_{\#}(\nu_1(s, a)), \right. \\
 &\quad \left. (f_{\gamma^{i+1}, \sum_{t=0}^i \gamma^t r_t})_{\#}(\nu_2(s, a)) \right) \tag{8} \\
 &\leq \sum_{i=0}^{\infty} \sum_{s \in S} \sum_{a \in A} \sum_{r_{0:i}} \frac{(1 - \lambda) \lambda^i w_{s,a,r_{0:i}}}{\mathcal{N}} l_p^p \left( (f_{\gamma^{i+1}, 0})_{\#}(\nu_1(s, a)), (f_{\gamma^{i+1}, 0})_{\#}(\nu_2(s, a)) \right) \\
 &= \sum_{i=0}^{\infty} \sum_{s \in S} \sum_{a \in A} \sum_{r_{0:i}} \frac{(1 - \lambda) \lambda^i w_{s,a,r_{0:i}}}{\mathcal{N}} \gamma^{i+1} l_p^p(\nu_1(s, a), \nu_2(s, a)) \\
 &\leq \sum_{i=0}^{\infty} \sum_{s \in S} \sum_{a \in A} \sum_{r_{0:i}} \frac{(1 - \lambda) \lambda^i w_{s,a,r_{0:i}}}{\mathcal{N}} \gamma^{i+1} (\bar{l}_p(\nu_1, \nu_2))^p \\
 &\leq \gamma (\bar{l}_p(\nu_1, \nu_2))^p.
 \end{aligned}$$

116 Therefore,  $\bar{l}_p(\mathcal{T}_\lambda^{\mu,\pi} \nu_1, \mathcal{T}_\lambda^{\mu,\pi} \nu_2) \leq \gamma^{1/p} \bar{l}_p(\nu_1, \nu_2)$ .  $\square$

117 By the Banach's fixed point theorem, the operator  $\mathcal{T}_\lambda^{\mu,\pi}$  has a unique fixed distribution. We now show  
 118 that the fixed distribution is  $\nu_R^\pi$ .

119 **Lemma A.6.** *The fixed distribution of the operator  $\mathcal{T}_\lambda^{\mu,\pi}$  is  $\nu_R^\pi$ .*

120 *Proof.* From the definition of  $Z_R^\pi$ , the following equality holds [Rowland et al., 2018]:  $\nu_R^\pi(s, a) =$   
 121  $\mathbb{E}_\pi[(f_{\gamma, r})_{\#}(\nu_R^\pi(s', a'))]$ . Then, it can be shown that  $\nu_R^\pi$  is the fixed distribution by applying the  
 122 operator  $\mathcal{T}_\lambda^{\mu,\pi}$  to  $\nu_R^\pi$ :

$$\begin{aligned}
 \mathcal{T}_\lambda^{\mu,\pi} \nu_R^\pi(s, a) &= \frac{1 - \lambda}{\mathcal{N}} \sum_{i=0}^{\infty} \lambda^i \\
 &\times \mathbb{E}_\mu \left[ \left( \prod_{j=1}^i \eta(s_j, a_j) \right) \mathbb{E}_{a' \sim \pi(\cdot | s_{i+1})} \left[ (f_{\gamma^{i+1}, \sum_{t=0}^i \gamma^t r_t})_{\#}(\nu_R^\pi(s_{i+1}, a')) \right] \middle| s_0 = s, a_0 = a \right] \\
 &= \frac{1 - \lambda}{\mathcal{N}} \sum_{i=0}^{\infty} \lambda^i \mathbb{E}_\pi \left[ (f_{\gamma^{i+1}, \sum_{t=0}^i \gamma^t r_t})_{\#}(\nu_R^\pi(s_{i+1}, a_{i+1})) \middle| s_0 = s, a_0 = a \right] \\
 &= \frac{1 - \lambda}{\mathcal{N}} \sum_{i=0}^{\infty} \lambda^i \nu_R^\pi(s, a) = \nu_R^\pi(s, a).
 \end{aligned} \tag{9}$$

123  $\square$

124 **Theorem 3.2.** *Let define a distributional operator  $\mathcal{T}_\lambda^{\mu,\pi}$ , whose probability density function is:*

$$\begin{aligned}
 & \Pr(\mathcal{T}_\lambda^{\mu,\pi} Z(s, a) = z) \propto \\
 & \sum_{i=0}^{\infty} \mathbb{E}_\mu \left[ \lambda^i \prod_{j=1}^i \frac{\pi(a_j | s_j)}{\mu(a_j | s_j)} \mathbb{E}_{a' \sim \pi(\cdot | s_{i+1})} \left[ \Pr \left( \sum_{t=0}^i \gamma^t R_t + \gamma^{i+1} Z(s_{i+1}, a') = z \right) \middle| s_0 = s, a_0 = a \right] \right]. \tag{10}
 \end{aligned}$$

125 Then, a sequence,  $Z_{k+1}(s, a) = \mathcal{T}_\lambda^{\mu,\pi} Z_k(s, a) \forall (s, a)$ , converges to  $Z_R^\pi$ .

126 *Proof.* The operator  $\mathcal{T}_\lambda^{\mu, \pi}$  is  $\gamma^{1/p}$ -contractive under the distance  $\bar{l}_p$  according to Lemma A.5. Also,  
 127 the fixed distribution of the operator is  $\nu_R^\pi$ , which is equivalent to  $Z_R^\pi$ , according to Lemma A.6. By  
 128 the Banach's fixed point theorem, the sequence,  $Z_{k+1}(s, a) = \mathcal{T}_\lambda^{\mu, \pi} Z_k(s, a) \forall (s, a)$ , converges to  
 129 the fixed distribution of the operator,  $Z_R^\pi$ .  $\square$

#### 130 A.4 Pseudocode of TD( $\lambda$ ) Target Distribution

131 We provide the pseudocode for calculating TD( $\lambda$ ) target distribution for the reward critic in Algorithm  
 132 1. The target distribution for the cost critics can also be obtained by simply replacing the reward part  
 133 with the cost.

---

##### Algorithm 1 TD( $\lambda$ ) Target Distribution

---

**Input:** Policy network  $\pi_\psi$ , critic network  $Z_\theta^\pi$ , and trajectory  $\{(s_t, a_t, \mu(a_t|s_t), r_t, d_t, s_{t+1})\}_{t=1}^T$ .  
 Sample an action  $a'_{T+1} \sim \pi_\psi(s_{T+1})$  and get  $\hat{Z}_T^{\text{tot}} = r_T + (1 - d_T)\gamma Z_\theta^\pi(s_{T+1}, a'_{T+1})$ .  
 Initialize the total weight  $w_{\text{tot}} = \lambda$ .  
**for**  $t = T$  **to** 1 **do**  
   Sample an action  $a'_{t+1} \sim \pi_\psi(s_{t+1})$  and get  $\hat{Z}_t^{(1)} = r_t + (1 - d_t)\gamma Z_\theta^\pi(s_{t+1}, a'_{t+1})$ .  
   Set the current weight  $w = 1 - \lambda$ .  
   Combine the two targets,  $(\hat{Z}_t^{(1)}, w)$  and  $(\hat{Z}_t^{(\text{tot})}, w_{\text{tot}})$ , and sort the combined target according  
   to the positions of atoms.  
   Build the CDF of the combined target by accumulating the weights at each atom.  
   Project the combined target into a quantile distribution with  $M'$  atoms, which is  $\hat{Z}_t^{(\text{proj})}$ , using  
   the CDF (find the atom positions corresponding to each quantile).  
   Update  $\hat{Z}_{t-1}^{(\text{tot})} = r_{t-1} + (1 - d_{t-1})\gamma \hat{Z}_t^{(\text{proj})}$  and  $w_{\text{tot}} = \lambda \frac{\pi_\psi(a_t|s_t)}{\mu(a_t|s_t)} (1 - d_{t-1})(1 - \lambda + w_{\text{tot}})$ .  
**end for**  
**Return**  $\{\hat{Z}_t^{(\text{proj})}\}_{t=1}^T$ .

---

#### 134 A.5 Quantitative Analysis on TD( $\lambda$ ) Target Distribution

135 We experiment with a toy example to measure the bias and variance of the reward estimation according  
 136 to  $\lambda$ . The toy example has two states,  $s_1$  and  $s_2$ ; the state distribution is defined as an uniform;  
 137 the reward function is defined as  $r(s_1) \sim \mathcal{N}(-0.005, 0.02)$  and  $r(s_2) \sim \mathcal{N}(0.005, 0.03)$ . We train  
 138 parameterized reward distributions by minimizing the quantile regression loss with the TD( $\lambda$ ) target  
 139 distribution for  $\lambda = 0, 0.5, 0.9$ , and  $1.0$ . The experimental results are presented in the table below.

Table 2: Experimental results of the toy example.

|                 | 5th iteration | 10th iteration | 15th iteration | 20th iteration | 25th iteration |
|-----------------|---------------|----------------|----------------|----------------|----------------|
| $\lambda = 0.0$ | 4.813 (0.173) | 4.024 (0.253)  | 3.498 (0.085)  | 3.131 (0.103)  | 2.835 (0.070)  |
| $\lambda = 0.5$ | 4.621 (0.185) | 3.688 (0.273)  | 2.925 (0.183)  | 2.379 (0.134)  | 2.057 (0.070)  |
| $\lambda = 0.9$ | 4.141 (0.461) | 2.237 (0.402)  | 1.389 (0.132)  | 1.058 (0.031)  | 0.923 (0.019)  |
| $\lambda = 1.0$ | 2.886 (0.767) | 1.733 (0.365)  | 1.509 (0.514)  | 1.142 (0.325)  | 1.109 (0.476)  |

140 The values in the table are the mean and standard deviation of the past five values of the Wasserstein  
 141 distance between the true reward return and the estimated distribution. Looking at the fifth iteration,  
 142 it is clear that the larger the  $\lambda$  value, the smaller the mean and the higher the standard deviation. At  
 143 the 25th iteration, the run with  $\lambda = 0.9$  has the lowest mean and standard deviation, indicating that  
 144 training has converged. On the other hand, the run with  $\lambda = 1.0$  has the biggest standard deviation,  
 145 and the mean is greater than when  $\lambda = 0.9$ , indicating that the significant variance hinders training.  
 146 In conclusion, we measured bias and variance quantitatively through the toy example, and the results  
 147 are well aligned with our claim that  $\lambda$  can trade off bias and variance.

## 148 A.6 Policy Update Rule

149 To solve the constrained optimization problem (6) in the main text, we find a policy update direction  
 150 by linearly approximating the objective and safety constraints and quadratically approximating the  
 151 trust region constraint, as done by Achiam et al. [2017]. After finding the direction, we update the  
 152 policy using a line search method. Given the current policy parameter  $\psi_t \in \Psi$ , the approximated  
 153 problem can be expressed as follows:

$$x^* = \operatorname{argmax}_{x \in \Psi} g^T x \quad \text{s.t.} \quad \frac{1}{2} x^T H x \leq \epsilon, \quad b_k^T x + c_k \leq 0 \quad \forall k, \quad (11)$$

154 where  $g = \nabla_{\psi} J^{\mu, \pi}(\pi_{\psi})|_{\psi=\psi_t}$ ,  $H = \nabla_{\psi}^2 D_{\text{KL}}(\pi_{\psi_t} || \pi_{\psi})|_{\psi=\psi_t}$ ,  $b_k = \nabla_{\psi} F_k^{\mu, \pi}(\pi_{\psi}; \alpha)|_{\psi=\psi_t}$ , and  
 155  $c_k = F_k(\pi_{\psi}; \alpha) - d_k$ . Since (11) is convex, we can use an existing convex optimization solver.  
 156 However, the search space, which is the policy parameter space  $\Psi$ , is excessively large, so we reduce  
 157 the space by converting (11) to a dual problem as follows:

$$\begin{aligned} g(\lambda, \nu) &= \min_x L(x, \lambda, \nu) = \min_x \left\{ -g^T x + \nu \left( \frac{1}{2} x^T H x - \epsilon \right) + \lambda^T (Bx + c) \right\} \\ &= \frac{-1}{2\nu} \left( \underbrace{g^T H^{-1} g}_{=:q} - 2 \underbrace{g^T H^{-1} B^T}_{=:r^T} \lambda + \lambda^T \underbrace{B H^{-1} B^T}_{=:S} \lambda \right) + \lambda^T c - \nu \epsilon \\ &= \frac{-1}{2\nu} (q - 2r^T \lambda + \lambda^T S \lambda) + \lambda^T c - \nu \epsilon, \end{aligned} \quad (12)$$

158 where  $B = (b_1, \dots, b_K)$ ,  $c = (c_1, \dots, c_K)^T$ , and  $\lambda \in \mathbb{R}^K \geq 0$  and  $\nu \in \mathbb{R} \geq 0$  are Lagrange multipliers.  
 159 Then, the optimal  $\lambda$  and  $\nu$  can be obtained by a convex optimization solver. After obtaining the  
 160 optimal values,  $(\lambda^*, \nu^*) = \operatorname{argmax}_{(\lambda, \nu)} g(\lambda, \nu)$ , the policy update direction  $x^*$  are calculated by  
 161  $\frac{1}{\nu^*} H^{-1} (g - B^T \lambda^*)$ . Then, the policy is updated by  $\psi_{t+1} = \psi_t + \beta x^*$ , where  $\beta$  is a step size, which  
 162 can be found through a backtracking method (please refer to Section 6.3.2 of Dennis and Schnabel  
 163 [1996]).

164 Before using the above policy update rule, we should note that the existing trust-region method with  
 165 the risk-averse constraint [Kim and Oh, 2022a] and the equations (1, 5, 6) of the main text are slightly  
 166 different. There are two differences: 1) the objective is augmented with an entropy bonus, and 2) the  
 167 surrogates are expressed with Q-functions instead of value functions. To use the entropy-regularized  
 168 objective for the trust region method, it is required to show that the objective is bounded by the KL  
 169 divergence. We present the existence of bound in Appendix A.7. Next, there is no problem using the  
 170 Q-functions because it is mathematically equivalent between the original surrogates [Kim and Oh,  
 171 2022a] and the new ones expressed with Q-functions defined in (5) of the main text. However, we  
 172 experimentally show that using the Q-functions in off-policy settings has advantages in Appendix  
 173 A.8.

## 174 A.7 Bound of Entropy-Augmented Objective

175 In the main text, the objective of the safe RL problem is augmented by entropy regularization as  
 176 follows:

$$J(\pi) := \mathbb{E} [Z_R^{\pi}(s, a) | s \sim \rho, a \sim \pi(\cdot | s)] + \beta \mathbb{E} \left[ \sum_{t=0}^{\infty} \gamma^t H(\pi(\cdot | s_t)) | \rho, \pi, P \right]. \quad (13)$$

177 To use the entropy-regularized objective for the trust region method, it is required to show that  
 178 the objective is bounded by the KL divergence. To this end, we show that the entropy-regularized  
 179 objective in (13) has a bound expressed by the KL divergence in this section. Before showing the  
 180 boundness, we present a new function and a lemma. A value difference function is defined as follows:

$$\delta^{\pi'}(s) := \mathbb{E} [R(s, a, s') + \gamma V^{\pi}(s') - V^{\pi}(s) \mid a \sim \pi'(\cdot | s), s' \sim P(\cdot | s, a)] = \mathbb{E}_{a \sim \pi'} [A^{\pi}(s, a)],$$

181 where  $A^{\pi}(s, a) := Q^{\pi}(s, a) - V^{\pi}(s, a)$ .

182 **Lemma A.7.** *The maximum of  $|\delta^{\pi'}(s) - \delta^{\pi}(s)|$  is equal or less than  $\epsilon_R \sqrt{2D_{\text{KL}}^{\max}(\pi || \pi')}$ , where*  
 183  $\epsilon_R = \max_{s, a} |A^{\pi}(s, a)|$ .



184 *Proof.* The value difference can be expressed in a vector form,

$$\delta^{\pi'}(s) - \delta^\pi(s) = \sum_a (\pi'(a|s) - \pi(a|s)) A^\pi(s, a) = \langle \pi'(\cdot|s) - \pi(\cdot|s), A^\pi(s, \cdot) \rangle.$$

185 Using Hölder's inequality, the following inequality holds:

$$\begin{aligned} |\delta^{\pi'}(s) - \delta^\pi(s)| &\leq \|\pi'(\cdot|s) - \pi(\cdot|s)\|_1 \cdot \|A^\pi(s, \cdot)\|_\infty \\ &= 2D_{\text{TV}}(\pi'(\cdot|s) \|\pi(\cdot|s)) \max_a A^\pi(s, a). \end{aligned}$$

186

$$\Rightarrow \|\delta^{\pi'} - \delta^\pi\|_\infty = \max_s |\delta^{\pi'}(s) - \delta^\pi(s)| \leq 2\epsilon_R \max_s D_{\text{TV}}(\pi(\cdot|s) \|\pi'(\cdot|s)).$$

187 Using Pinsker's inequality,  $\|\delta^{\pi'} - \delta^\pi\|_\infty \leq \epsilon_R \sqrt{2D_{\text{KL}}^{\max}(\pi \|\pi')}$ .  $\square$

188 **Theorem A.8.** Let us assume that  $\max_s H(\pi(\cdot|s)) < \infty$  for  $\forall \pi \in \Pi$ . The difference between the  
189 objective and surrogate functions is bounded by a term consisting of KL divergence as:

$$|J(\pi') - J^{\mu, \pi}(\pi')| \leq \frac{\sqrt{2}\gamma}{(1-\gamma)^2} \sqrt{D_{\text{KL}}^{\max}(\pi \|\pi')} \left( \beta\epsilon_H + \epsilon_R \sqrt{2D_{\text{KL}}^{\max}(\mu \|\pi')} \right), \quad (14)$$

190 where  $\epsilon_H = \max_s |H(\pi'(\cdot|s))|$ ,  $D_{\text{KL}}^{\max}(\pi \|\pi') = \max_s D_{\text{KL}}(\pi(\cdot|s) \|\pi'(\cdot|s))$ , and the equality holds  
191 when  $\pi' = \pi$ .

192 *Proof.* The surrogate function can be expressed in vector form as follows:

$$J^{\mu, \pi}(\pi') = \langle \rho, V^\pi \rangle + \frac{1}{1-\gamma} \left( \langle d^\mu, \delta^{\pi'} \rangle + \beta \langle d^\pi, H^{\pi'} \rangle \right),$$

193 where  $H^{\pi'}(s) = H(\pi'(\cdot|s))$ . The objective function of  $\pi'$  can also be expressed in a vector form  
194 using Lemma 1 from Achiam et al. [2017],

$$\begin{aligned} J(\pi') &= \frac{1}{1-\gamma} \mathbb{E} \left[ R(s, a, s') + \beta H^{\pi'}(s) \mid s \sim d^{\pi'}, a \sim \pi'(\cdot|s), s' \sim P(\cdot|s, a) \right] \\ &= \frac{1}{1-\gamma} \mathbb{E}_{s \sim d^{\pi'}} \left[ \delta^{\pi'}(s) + \beta H^{\pi'}(s) \right] + \mathbb{E}_{s \sim \rho} [V^\pi(s)] \\ &= \langle \rho, V^\pi \rangle + \frac{1}{1-\gamma} \langle d^{\pi'}, \delta^{\pi'} + \beta H^{\pi'} \rangle. \end{aligned}$$

195 By Lemma 3 from Achiam et al. [2017],  $\|d^\pi - d^{\pi'}\|_1 \leq \frac{\gamma}{1-\gamma} \sqrt{2D_{\text{KL}}^{\max}(\pi \|\pi')}$ . Then, the following  
196 inequality is satisfied:

$$\begin{aligned} |(1-\gamma)(J^{\mu, \pi}(\pi') - J(\pi'))| &= |\langle d^{\pi'} - d^\mu, \delta^{\pi'} \rangle + \beta \langle d^\pi - d^{\pi'}, H^{\pi'} \rangle| \\ &\leq |\langle d^{\pi'} - d^\mu, \delta^{\pi'} \rangle| + \beta |\langle d^\pi - d^{\pi'}, H^{\pi'} \rangle| \\ &= |\langle d^{\pi'} - d^\mu, \delta^{\pi'} - \delta^\pi \rangle| + \beta |\langle d^\pi - d^{\pi'}, H^{\pi'} \rangle| \quad (\because \delta^\pi = 0) \\ &\leq \|d^{\pi'} - d^\mu\|_1 \|\delta^{\pi'} - \delta^\pi\|_\infty + \beta \|d^\pi - d^{\pi'}\|_1 \|H^{\pi'}\|_\infty \quad (\because \text{Hölder's inequality}) \\ &\leq \frac{2\epsilon_R\gamma}{1-\gamma} \sqrt{D_{\text{KL}}^{\max}(\mu \|\pi') D_{\text{KL}}^{\max}(\pi \|\pi')} + \frac{\beta\gamma\epsilon_H}{1-\gamma} \sqrt{2D_{\text{KL}}^{\max}(\pi \|\pi')} \quad (\because \text{Lemma A.7}) \\ &= \frac{\gamma}{1-\gamma} \sqrt{D_{\text{KL}}^{\max}(\pi \|\pi')} \left( \sqrt{2}\beta\epsilon_H + 2\epsilon_R \sqrt{D_{\text{KL}}^{\max}(\mu \|\pi')} \right). \end{aligned}$$

197 If  $\pi' = \pi$ , the KL divergence term becomes zero, so equality holds.  $\square$

## 198 A.8 Comparison of Q-Function and Value Function-Based Surrogates

199 The original surrogate is defined as follows:

$$J^{\mu,\pi}(\pi') := J(\pi) + \frac{1}{1-\gamma} \mathbb{E}_{d^{\mu,\mu}} \left[ \frac{\pi'(a|s)}{\mu(a|s)} A^\pi(s, a) \right], \quad (15)$$

200 where  $A^\pi(s, a) := Q^\pi(s, a) - V^\pi(s, a)$ , and the surrogate is the same as that of OffTRPO [Meng  
201 et al., 2022] and OffTRC [Kim and Oh, 2022a]. An entropy-regularized version can be derived as:

$$J^{\mu,\pi}(\pi') = J(\pi) + \frac{1}{1-\gamma} \left( \beta \mathbb{E}_{d^\pi} [H(\pi'(\cdot|s))] + \mathbb{E}_{d^{\mu,\mu}} \left[ \frac{\pi'(a|s)}{\mu(a|s)} A^\pi(s, a) \right] \right). \quad (16)$$

202 Then, the surrogate expressed by Q-functions in (5) of the main text, called SAC-style version, can  
203 be rewritten as:

$$J^{\mu,\pi}(\pi') = J(\pi) + \frac{1}{1-\gamma} \left( \beta \mathbb{E}_{d^\pi} [H(\pi'(\cdot|s))] + \mathbb{E}_{d^{\mu,\pi'}} [Q^\pi(s, a)] \right). \quad (17)$$

204 In this section, we evaluate the original, entropy-regularized, and SAC-style versions in the continuous  
205 control tasks of the MuJoCo simulators [Todorov et al., 2012]. We use neural networks with two  
206 hidden layers with (512, 512) nodes and ReLU for the activation function. The output of a value  
207 network is linear, but the input is different; the original and entropy-regularized versions use states,  
208 and the SAC-style version uses state-action pairs. The input of a policy network is the state, the  
209 output is mean  $\mu$  and std  $\sigma$ , and actions are squashed into  $\tanh(\mu + \epsilon\sigma)$ ,  $\epsilon \sim \mathcal{N}(0, 1)$  as in SAC  
210 [Haarnoja et al., 2018]. The entropy coefficient  $\beta$  in the entropy-regularized and SAC-style versions  
211 are adaptively adjusted to keep the entropy above a threshold (set as  $-d$  given  $A \subseteq \mathbb{R}^d$ ). The  
hyperparameters for all versions are summarized in Table 3.

Table 3: Hyperparameters for all versions.

| Parameter                           | Value  |
|-------------------------------------|--------|
| Discount factor $\gamma$            | 0.99   |
| Trust region size $\epsilon$        | 0.001  |
| Length of replay buffer             | $10^5$ |
| Critic learning rate                | 0.0003 |
| Trace-decay $\lambda$               | 0.97   |
| Initial entropy coefficient $\beta$ | 1.0    |
| $\beta$ learning rate               | 0.01   |

212

213 The training curves are presented in Figure 1. All methods are trained with five different random  
214 seeds. Although the entropy-regularized version (16) and SAC-style version (17) are mathematically  
215 equivalent, it can be observed that the performance of the SAC-style version is superior to the  
216 regularized version. It can be inferred that this is due to the variance of importance sampling. In the  
217 off-policy setting, the sampling probabilities of the behavioral and current policies can be significantly  
218 different, so the variance of the importance ratio is huge. The increased variance prevents estimating  
219 the objective accurately, so significant performance degradation can happen. As a result, using the  
220 Q-function-based surrogates has an advantage for efficient learning.

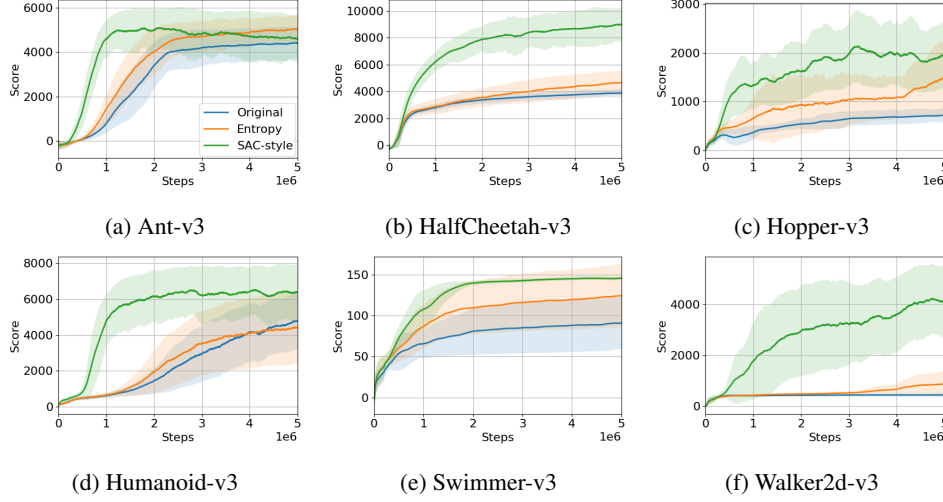

Figure 1: MuJoCo training curves.

## 221 B Experimental Settings

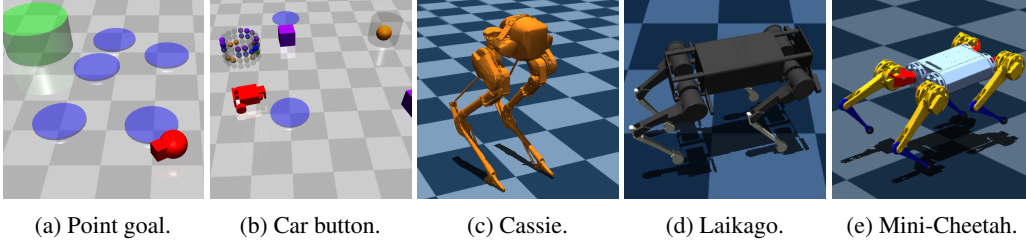

Figure 2: (a) and (b) are Safety Gym tasks. (c), (d), and (e) are locomotion tasks.

222 **Safety Gym.** We use the goal and button tasks with the point and car robots in the Safety Gym  
 223 environment [Ray et al., 2019], as shown in Figure 2a and 2b. The environmental setting for the goal  
 224 task is the same as in Kim and Oh [2022b]. Eight hazard regions and one goal are randomly spawned  
 225 at the beginning of each episode, and a robot gets a reward and cost as follows:

$$\begin{aligned} R(s, a, s') &= -\Delta d_{\text{goal}} + \mathbf{1}_{d_{\text{goal}} \leq 0.3}, \\ C(s, a, s') &= \text{Sigmoid}(10 \cdot (0.2 - d_{\text{hazard}})), \end{aligned} \quad (18)$$

226 where  $d_{\text{goal}}$  is the distance to the goal, and  $d_{\text{hazard}}$  is the minimum distance to hazard regions. If  
 227  $d_{\text{goal}}$  is less than or equal to 0.3, a goal is respawned. The state consists of relative goal position,  
 228 goal distance, linear and angular velocities, acceleration, and LiDAR values. The action space is  
 229 two-dimensional, which consists of  $xy$ -directional forces for the point and wheel velocities for the  
 230 car robot.

231 The environmental settings for the button task are the same as in Liu et al. [2022]. There are five  
 232 hazard regions, four dynamic obstacles, and four buttons, and all components are fixed throughout the  
 233 training. The initial position of a robot and an activated button are randomly placed at the beginning  
 234 of each episode. The reward function is the same as in (18), but the cost is different since there is no  
 235 dense signal for contacts. We define the cost function for the button task as an indicator function that  
 236 outputs one if the robot makes contact with an obstacle or an inactive button or enters a hazardous  
 237 region. We add LiDAR values of buttons and obstacles to the state of the goal task, and actions are  
 238 the same as the goal task. The length of the episode is 1000 steps without early termination.

239 **Locomotion Tasks.** We use three different legged robots, Mini-Cheetah, Laikago, and Cassie, for  
 240 the locomotion tasks, as shown in Figure 2e, 2d, and 2c. The tasks aim to control robots to follow  
 241 a velocity command on flat terrain. A velocity command is given by  $(v_x^{\text{cmd}}, v_y^{\text{cmd}}, \omega_z^{\text{cmd}})$ , where

242  $v_x^{\text{cmd}} \sim \mathcal{U}(-1.0, 1.0)$  for Cassie and  $\mathcal{U}(-1.0, 2.0)$  otherwise,  $v_y^{\text{cmd}} = 0$ , and  $\omega_z^{\text{cmd}} \sim \mathcal{U}(-0.5, 0.5)$ .  
 243 To lower the task complexity, we set the  $y$ -directional linear velocity to zero but can scale to any  
 244 non-zero value. As in other locomotion studies [Lee et al., 2020, Miki et al., 2022], *central phases* are  
 245 introduced to produce periodic motion, which are defined as  $\phi_i(t) = \phi_{i,0} + f \cdot t$  for  $\forall i \in \{1, \dots, n_{\text{legs}}\}$ ,  
 246 where  $f$  is a frequency coefficient and is set to 10, and  $\phi_{i,0}$  is an initial phase. Actuators of robots  
 247 are controlled by PD control towards target positions given by actions. The state consists of velocity  
 248 command, orientation of the robot frame, linear and angular velocities of the robot, positions and  
 249 speeds of the actuators, central phases, history of positions and speeds of the actuators (past two  
 250 steps), and history of actions (past two steps). A foot contact timing  $\xi$  can be defined as follows:

$$\xi_i(s) = -1 + 2 \cdot \mathbf{1}_{\sin(\phi_i) \leq 0} \quad \forall i \in \{1, \dots, n_{\text{legs}}\}, \quad (19)$$

251 where a value of -1 means that the  $i$ th foot is on the ground; otherwise, the foot is in the air. For  
 252 the quadrupedal robots, Mini-Cheetah and Laikago, we use the initial phases as  $\phi_0 = \{0, \pi, \pi, 0\}$ ,  
 253 which generates trot gaits. For the bipedal robot, Cassie, the initial phases are defined as  $\phi_0 = \{0, \pi\}$ ,  
 254 which generates walk gaits. Then, the reward and cost functions are defined as follows:

$$\begin{aligned} R(s, a, s') &= -0.1 \cdot (\|v_{x,y}^{\text{base}} - v_{x,y}^{\text{cmd}}\|_2^2 + \|\omega_z^{\text{base}} - \omega_z^{\text{cmd}}\|_2^2 + 10^{-3} \cdot R_{\text{power}}), \\ C_1(s, a, s') &= \mathbf{1}_{\text{angle} \geq a}, \quad C_2(s, a, s') = \mathbf{1}_{\text{height} \leq b}, \quad C_3(s, a, s') = \sum_{i=1}^{n_{\text{legs}}} (1 - \xi_i \cdot \hat{\xi}_i) / (2 \cdot n_{\text{legs}}), \end{aligned} \quad (20)$$

255 where the power consumption  $R_{\text{power}} = \sum_i |\tau_i v_i|$ , the sum of the torque times the actuator speed, is  
 256 added to the reward as a regularization term,  $v_{x,y}^{\text{base}}$  is the  $xy$ -directional linear velocity of the base  
 257 frame of robots,  $\omega_z^{\text{base}}$  is the  $z$ -directional angular velocity of the base frame, and  $\hat{\xi} \in \{-1, 1\}^{n_{\text{legs}}}$  is  
 258 the current feet contact vector. For balancing, the first cost indicates whether the angle between the  
 259  $z$ -axis vector of the robot base and the world is greater than a threshold ( $a = 15^\circ$  for all robots). For  
 260 standing, the second cost indicates the height of CoM is less than a threshold ( $b = 0.3, 0.35, 0.7$  for  
 261 Mini-Cheetah, Laikago, and Cassie, respectively), and the last cost is to check that the current feet  
 262 contact vector  $\hat{\xi}$  matches the pre-defined timing  $\xi$ . The length of the episode is 500 steps. There is no  
 263 early termination, but if a robot falls to the ground, the state is frozen until the end of the episode.

264 **Hyperparameter Settings.** The structure of neural networks consists of two hidden layers with  
 265 (512, 512) nodes and ReLU activation for all baselines and the proposed method. The input of value  
 266 networks is state-action pairs, and the output is the positions of atoms. The input of policy networks  
 267 is the state, the output is mean  $\mu$  and std  $\sigma$ , and actions are squashed into  $\tanh(\mu + \epsilon\sigma)$ ,  $\epsilon \sim \mathcal{N}(0, 1)$ .  
 268 We use a fixed entropy coefficient  $\beta$ . The trust region size  $\epsilon$  is set to 0.001 for all trust region-based  
 methods. The overall hyperparameters for the proposed method can be summarized in Table 4.

Table 4: Hyperparameter settings for the Safety Gym and locomotion tasks.

| Parameter                       | Safety Gym           | Locomotion                         |
|---------------------------------|----------------------|------------------------------------|
| Discount factor $\gamma$        | 0.99                 | 0.99                               |
| Trust region size $\epsilon$    | 0.001                | 0.001                              |
| Length of replay buffer         | $10^5$               | $10^5$                             |
| Critic learning rate            | 0.0003               | 0.0003                             |
| Trace-decay $\lambda$           | 0.97                 | 0.97                               |
| Entropy coefficient $\beta$     | 0.0                  | 0.001                              |
| The number of critic atoms $M$  | 25                   | 25                                 |
| The number of target atoms $M'$ | 50                   | 50                                 |
| Constraint risk level $\alpha$  | 0.25, 0.5, and 1.0   | 1.0                                |
| threshold $d_k$                 | $0.025/(1 - \gamma)$ | $[0.025, 0.025, 0.4]/(1 - \gamma)$ |
| Slack coefficient $\zeta$       | -                    | $\min_k d_k = 0.025/(1 - \gamma)$  |

269 Since the range of the cost is  $[0, 1]$ , the maximum discounted cost sum is  $1/(1 - \gamma)$ . Thus, the  
 270 threshold is set by target cost rate times  $1/(1 - \gamma)$ . For the locomotion tasks, the third cost in (20)  
 271 is designed for foot stamping, which is not essential to safety. Hence, we set the threshold to near  
 272 the maximum (if a robot does not stamp, the cost rate becomes 0.5). In addition, baseline safe RL  
 273 methods use multiple critic networks for the cost function, such as target [Yang et al., 2021] or square  
 274 value networks [Kim and Oh, 2022a]. To match the number of network parameters, we use two critics  
 275 as an ensemble, as in Kuznetsov et al. [2020].  
 276

## 277 Tips for Hyperparameter Tuning.

- 278 • Discount factor  $\gamma$ , Critic learning rate: Since these are commonly used hyperparameters, we  
279 do not discuss these.
- 280 • Trace-decay  $\lambda$ , Trust region size  $\epsilon$ : The ablation studies on these hyperparameters are  
281 presented in Appendix C.3. From the results, we recommend setting the trace-decay to  
282  $0.95 \sim 0.99$  as in other TD( $\lambda$ )-based methods [Precup et al., 2000]. Also, the results show  
283 that the performance is not sensitive to the trust region size. However, if the trust region size  
284 is too large, the approximation error increases, so it is better to set it below 0.003.
- 285 • Entropy coefficient  $\beta$ : This value is fixed in our experiments, but it can be adjusted automat-  
286 ically as done in SAC [Haarnoja et al., 2018].
- 287 • The number of atoms  $M, M'$ : Although experiments on the number of atoms did not  
288 performed, performance is expected to increase as the number of atoms increases, as in  
289 other distributional RL methods [Dabney et al., 2018].
- 290 • Length of replay buffer: The effect of the length of the replay buffer can be confirmed  
291 through the experimental results from an off policy-based safe RL method [Kim and Oh,  
292 2022a]. According to that, the length does not impact performance unless it is too short. We  
293 recommend setting it to 10 to 100 times the collected trajectory length.
- 294 • Constraint risk level  $\alpha$ , threshold  $d_k$ : If the cost sum follows a Gaussian distribution,  
295 the mean-std constraint is identical to the CVaR constraint. Then, the probability of the  
296 worst case can be controlled by adjusting  $\alpha$ . For example, if we set  $\alpha = 0.125$  and  
297  $d = 0.03/(1 - \gamma)$ , the mean-std constraint enforces the probability that the average cost  
298 is less than 0.03 during an episode greater than  $95\% = \Phi(\phi(\Phi^{-1}(\alpha))/\alpha)$ . Through this  
299 meaning, proper  $\alpha$  and  $d_k$  can be found.
- 300 • Slack coefficient  $\zeta$ : As mentioned at the end of Section 3.1, it is recommended to set this  
301 coefficient as large as possible. Since  $d_k - \zeta$  should be positive, we recommend setting  $\zeta$  to  
302  $\min_k d_k$ .

303 In conclusion, most hyperparameters are not sensitive, so few need to be optimized. It seems that  $\alpha$   
304 and  $d_k$  need to be set based on the meaning described above. Additionally, if the approximation error  
305 of critics is significant, the trust region size should be set smaller.

## 306 C Experimental Results

### 307 C.1 Safety Gym

308 In this section, we present the training curves of the Safety Gym tasks separately according to the  
 309 risk level of constraints for better readability. Figure 3 shows The training results of the risk-neutral  
 310 constrained algorithms and risk-averse constrained algorithms with  $\alpha = 1.0$ . Figures 4 and 5 show  
 311 the training results of the risk-averse constrained algorithms with  $\alpha = 0.25$  and  $0.5$ , respectively.

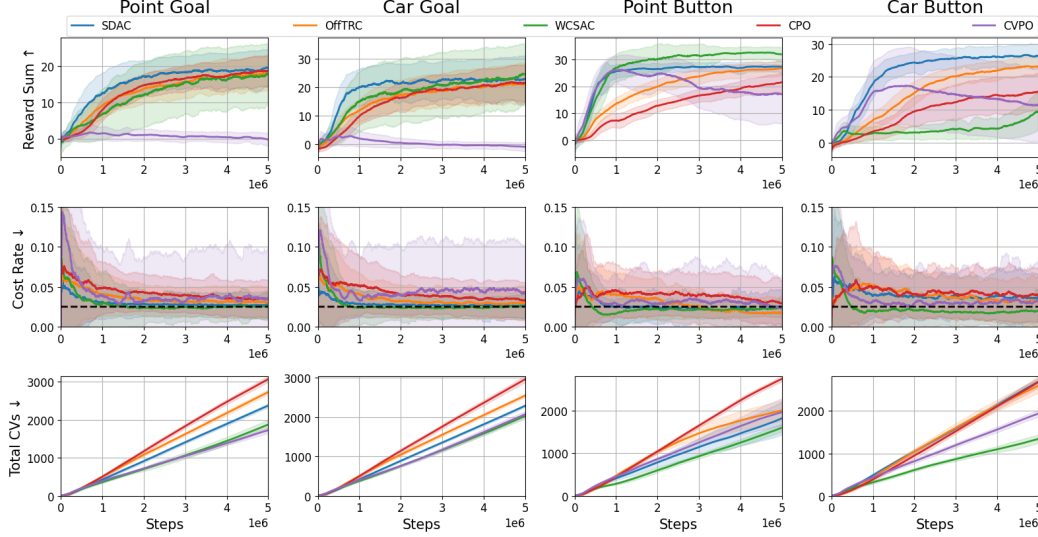

Figure 3: Training curves of risk-neutral constrained algorithms for the Safety Gym tasks. The solid line and shaded area represent the average and std values, respectively. The black dashed lines in the second row indicate thresholds. All methods are trained with five random seeds.

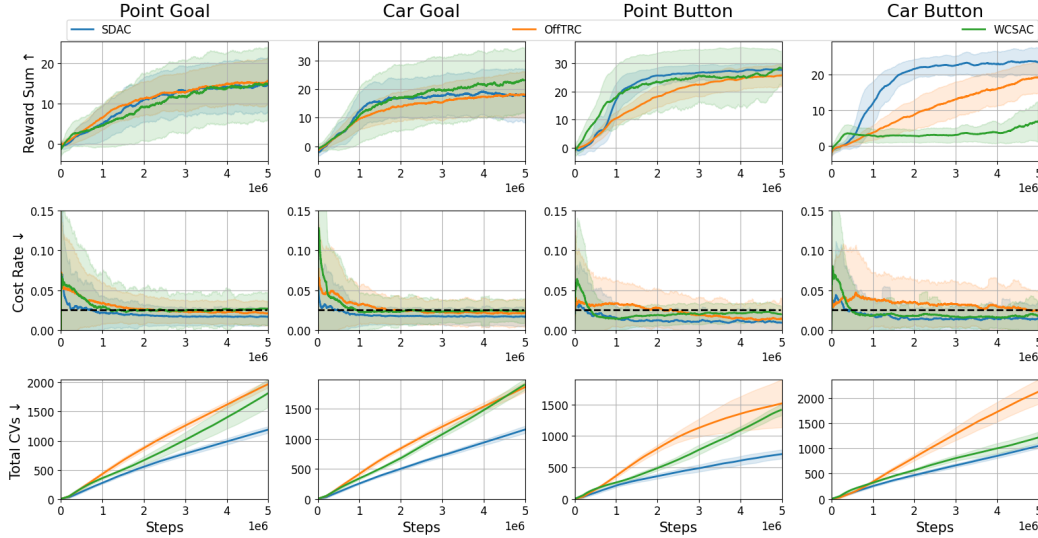

Figure 4: Training curves of risk-averse constrained algorithms with  $\alpha = 0.5$  for the Safety Gym.

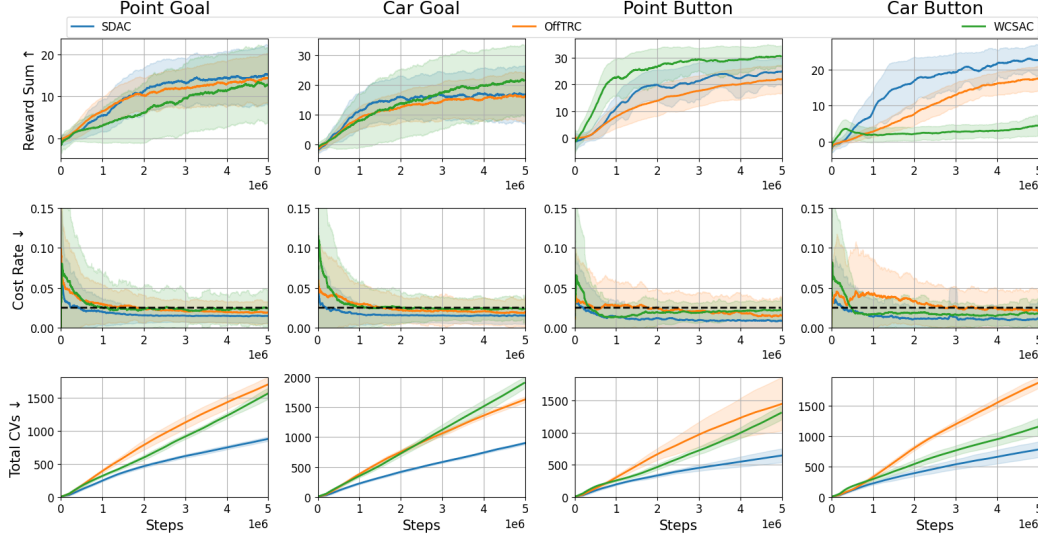

Figure 5: Training curves of risk-averse constrained algorithms with  $\alpha = 0.25$  for the Safety Gym.

## 312 C.2 Ablation Study on Components of SDAC

313 There are three main differences between SDAC and the existing trust region-based safe RL algorithm  
 314 for mean-std constraints [Kim and Oh, 2022a], called OffTRC: 1) feasibility handling methods in  
 315 multi-constraint settings, 2) the use of distributional critics, and 3) the use of Q-functions instead of  
 316 advantage functions, as explained in Appendix A.6 and A.8. Since the ablation study for feasibility  
 317 handling is conducted in Section 5.3, we perform ablation studies for the distributional critic and  
 318 Q-function in this section. We call SDAC with only distributional critics as *SDAC-Dist* and SDAC  
 319 with only Q-functions as *SDAC-Q*. If all components are absent, SDAC is identical to OffTRC [Kim  
 320 and Oh, 2022a]. The variants are trained with the point goal task of the Safety Gym, and the training  
 321 results are shown in Figure 6. SDAC-Q lowers the cost rate quickly but shows the lowest score.  
 322 SDAC-Dist shows scores similar to SDAC, but the cost rate converges above the threshold 0.025. In  
 323 conclusion, SDAC can efficiently satisfy the safety constraints through the use of Q-functions and  
 324 improve score performance through the distributional critics.

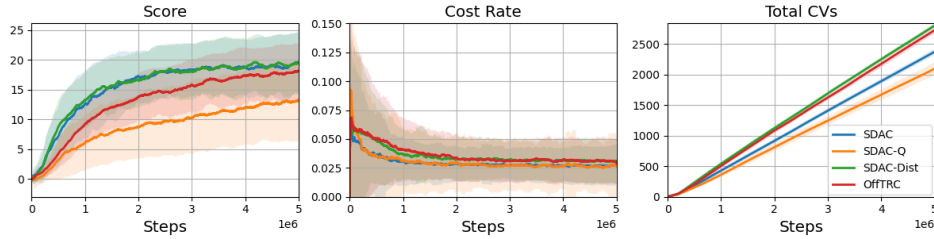

Figure 6: Training curves of variants of SDAC for the point goal task.

### 325 C.3 Ablation Study on Hyperparameters

326 To check the effects of the hyperparameters, we conduct ablation studies on the trust region size  $\epsilon$   
 327 and entropy coefficient  $\beta$ . The results on the entropy coefficient are presented in Figure 7a, showing  
 328 that the score significantly decreases when  $\beta$  is 0.01. This indicates that policies with high entropy  
 329 fail to improve score performance since they focus on satisfying the constraints. Thus, the entropy  
 330 coefficient should be adjusted cautiously, or it can be better to set the coefficient to zero. The results on  
 331 the trust region size are shown in Figure 7b, which shows that the results do not change significantly  
 332 regardless of the trust region size. However, the score convergence rate for  $\epsilon = 0.01$  is the slowest  
 333 because the estimation error of the surrogate increases as the trust region size increases according to  
 334 Theorem A.8.

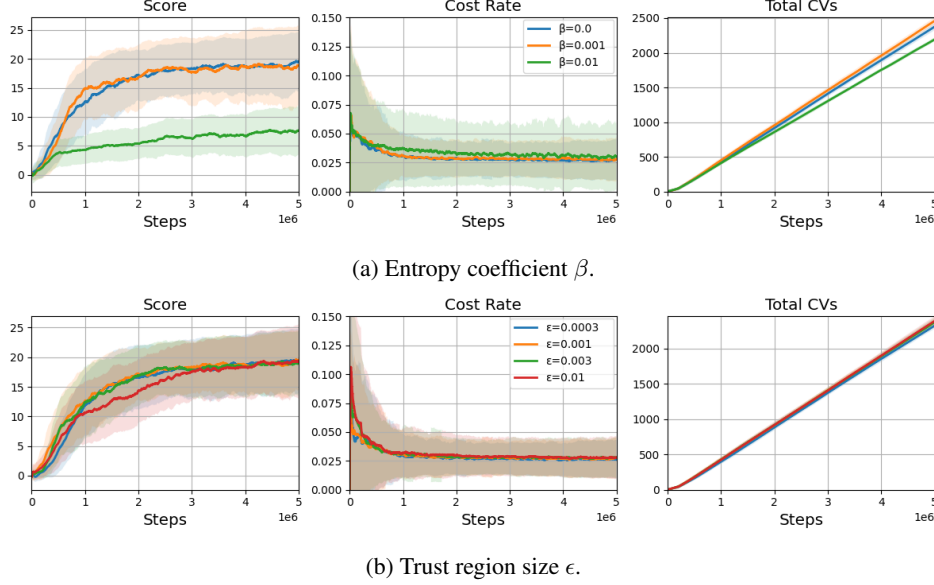

Figure 7: Training curves of SDAC with different hyperparameters for the point goal task.



## D Comparison with RL Algorithms

In this section, we compare the proposed safe RL algorithm with traditional RL algorithms in the locomotion tasks and show that safe RL has the advantage of not requiring reward tuning. We use the truncated quantile critic (TQC) [Kuznetsov et al., 2020], a state-of-the-art algorithm in existing RL benchmarks [Todorov et al., 2012], as traditional RL baselines. To apply the same experiment to traditional RL, it is necessary to design a reward reflecting safety. We construct the reward through a weighted sum as  $\bar{R} = (R - \sum_{i=1}^3 w_i C_i) / (1 + \sum_{i=1}^3 w_i)$ , where  $R$  and  $C_{\{1,2,3\}}$  are used to train safe RL methods and are defined in Appendix B, and  $R$  is called the *true reward*. The weights of the reward function  $w_{\{1,2,3\}}$  are searched by a Bayesian optimization tool<sup>1</sup> to maximize the true reward of TQC in the Mini-Cheetah task. Among the 63 weights searched through Bayesian optimization, the top five weights are listed in Table 5.

Table 5: Weights of the reward function for the Mini-Cheetah task.

| Reward weights | $w_1$ | $w_2$ | $w_3$ |
|----------------|-------|-------|-------|
| #1             | 1.588 | 0.299 | 0.174 |
| #2             | 1.340 | 0.284 | 0.148 |
| #3             | 1.841 | 0.545 | 0.951 |
| #4             | 6.560 | 0.187 | 4.920 |
| #5             | 1.603 | 0.448 | 0.564 |

Figure 8 shows the training curves of the Mini-Cheetah task experiments where TQC is trained using the weight pairs listed in Table 5. The graph shows that it is difficult for TQC to lower the second cost below the threshold while all costs of SDAC are below the threshold. In particular, TQC with the fifth weight pairs shows the lowest second cost rate, but the true reward sum is the lowest. This shows that it is challenging to obtain good task performance while satisfying the constraints through reward tuning.

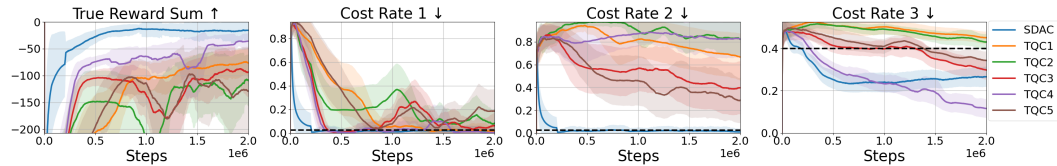

Figure 8: Training curves of the Mini-Cheetah task. The black dashed lines show the thresholds used for the safe RL method. The solid line represents the average value, and the shaded area shows one-fifth of the std value. The number after TQC in the legend indicates which of the reward weights in Table 5 is used. All methods are trained with five different random seeds.

<sup>1</sup>We use Sweeps from Weights & Biases Biewald [2020].

## E Computational Cost Analysis

### E.1 Complexity of Gradient Integration Method

In this section, we analyze the computational cost of the gradient integration method. The proposed gradient integration method has three subparts. First, it is required to calculate policy gradients of each cost surrogate,  $g_k$ , and  $H^{-1}g_k$  for  $\forall k \in \{1, 2, \dots, K\}$ , where  $H$  is the Hessian matrix of the KL divergence.  $H^{-1}g_k$  can be computed using the conjugate gradient method, which requires only a constant number of back-propagation on the cost surrogate, so the computational cost can be expressed as  $K \cdot O(\text{BackProp})$ .

Second, the quadratic problem in Section 3.1 is transformed to a dual problem, where the transformation process requires inner products between  $g_k$  and  $H^{-1}g_m$  for  $\forall k, m \in \{1, 2, \dots, K\}$ . The computational cost can be expressed as  $K^2 \cdot O(\text{InnerProd})$ .

Finally, the transformed quadratic problem is solved in the dual space  $\in \mathbb{R}^K$  using a quadratic programming solver. Since  $K$  is usually much smaller than the number of policy parameters, the computational cost almost negligible compared to the others. Then, the cost of the gradient integration is  $K \cdot O(\text{BackProp}) + K^2 \cdot O(\text{InnerProd}) + C$ . Since the back-propagation and the inner products is proportional to the number of policy parameters  $|\psi|$ , the computational cost can be simplified as  $O(K^2 \cdot |\psi|)$ .

### E.2 Quantitative Analysis

Table 6: Training time of Safe RL algorithms (in hours). The training time of each algorithm is measured as the average time required for training with five random seeds. The total training steps are  $5 \cdot 10^6$  and  $3 \cdot 10^6$  for the point goal task and the Mini-Cheetah task, respectively.

| Task                      | SDAC (proposed) | OffTRC | WCSAC | CPO  | CVPO  |
|---------------------------|-----------------|--------|-------|------|-------|
| Point goal (Safety Gym)   | 7.96            | 4.86   | 19.07 | 2.61 | 47.43 |
| Mini-Cheetah (Locomotion) | 8.36            | 6.54   | 16.41 | 1.99 | -     |

We analyze the computational cost of the proposed method quantitatively. To do this, we measure the training time of the proposed method, SDAC, and the safe RL baselines. We use a workstation whose CPU is the Intel Xeon e5-2650 v3, and GPU is the NVIDIA GeForce GTX TITAN X. The results are presented in Table 6. While CPO is the fastest algorithm, its performance, such as the sum of rewards, is relatively poor compared to other algorithms. The main reason why CPO shows the fastest computation time is that CPO is an on-policy algorithm, hence, it does not require an insertion to (and deletion from) a replay memory, and batch sampling. SDAC shows the third fastest computation time in all algorithms and the second best one among off-policy algorithms. Especially, SDAC is slightly slower than OffTRC, which is the fastest one among off-policy algorithms. This result shows the benefit of SDAC since SDAC outperforms OffTRC in terms of the returns and CV, but the training time is not significantly increased over OffTRC. WCSAC, which is based on SAC, has a slower training time because it updates networks more frequently than other algorithms. CVPO, an EM-based safe RL algorithm, has the slowest training time. In the E-step of CVPO, a non-parametric policy is optimized to solve a local subproblem, and the optimization process requires discretizing the action space and solving a non-linear convex optimization for all batch states. Because of this, CVPO takes the longest to train an RL agent.

## References

- J. Achiam, D. Held, A. Tamar, and P. Abbeel. Constrained policy optimization. In *Proceedings of International Conference on Machine Learning*, pages 22–31, 2017.
- M. G. Bellemare, W. Dabney, and M. Rowland. *Distributional Reinforcement Learning*. MIT Press, 2023. <http://www.distributional-rl.org>.
- L. Biewald. Experiment tracking with weights and biases, 2020. URL <https://www.wandb.com/>. Software available from wandb.com.
- W. Dabney, G. Ostrovski, D. Silver, and R. Munos. Implicit quantile networks for distributional reinforcement learning. In *Proceedings of International conference on machine learning*, pages 1096–1105, 2018.
- J. E. Dennis and R. B. Schnabel. *Numerical Methods for Unconstrained Optimization and Nonlinear Equations*. Society for Industrial and Applied Mathematics, 1996.
- T. Haarnoja, A. Zhou, P. Abbeel, and S. Levine. Soft actor-critic: Off-policy maximum entropy deep reinforcement learning with a stochastic actor. In *Proceedings of International Conference on Machine Learning*, pages 1861–1870, 2018.
- D. Kim and S. Oh. Efficient off-policy safe reinforcement learning using trust region conditional value at risk. *IEEE Robotics and Automation Letters*, 7(3):7644–7651, 2022a.
- D. Kim and S. Oh. TRC: Trust region conditional value at risk for safe reinforcement learning. *IEEE Robotics and Automation Letters*, 7(2):2621–2628, 2022b.
- A. Kuznetsov, P. Shvechikov, A. Grishin, and D. Vetrov. Controlling overestimation bias with truncated mixture of continuous distributional quantile critics. In *Proceedings International Conference on Machine Learning*, pages 5556–5566, 2020.
- J. Lee, J. Hwangbo, L. Wellhausen, V. Koltun, and M. Hutter. Learning quadrupedal locomotion over challenging terrain. *Science Robotics*, 5(47):eabc5986, 2020.
- Z. Liu, Z. Cen, V. Isenbaev, W. Liu, S. Wu, B. Li, and D. Zhao. Constrained variational policy optimization for safe reinforcement learning. In *Proceedings of International Conference on Machine Learning*, pages 13644–13668, 2022.
- W. Meng, Q. Zheng, Y. Shi, and G. Pan. An off-policy trust region policy optimization method with monotonic improvement guarantee for deep reinforcement learning. *IEEE Transactions on Neural Networks and Learning Systems*, 33(5):2223–2235, 2022.
- T. Miki, J. Lee, J. Hwangbo, L. Wellhausen, V. Koltun, and M. Hutter. Learning robust perceptive locomotion for quadrupedal robots in the wild. *Science Robotics*, 7(62):eabk2822, 2022.
- D. Precup, R. S. Sutton, and S. P. Singh. Eligibility traces for off-policy policy evaluation. In *Proceedings of International Conference on Machine Learning*, pages 759–766, 2000.
- A. Ray, J. Achiam, and D. Amodei. Benchmarking Safe Exploration in Deep Reinforcement Learning. 2019.
- M. Rowland, M. Bellemare, W. Dabney, R. Munos, and Y. W. Teh. An analysis of categorical distributional reinforcement learning. In *Proceedings of International Conference on Artificial Intelligence and Statistics*, pages 29–37, 2018.
- E. Todorov, T. Erez, and Y. Tassa. MuJoCo: A physics engine for model-based control. In *Proceedings of International Conference on Intelligent Robots and Systems*, pages 5026–5033, 2012.
- Q. Yang, T. D. Simão, S. H. Tindemans, and M. T. J. Spaan. WCSAC: Worst-case soft actor critic for safety-constrained reinforcement learning. *Proceedings of the AAAI Conference on Artificial Intelligence*, 35(12):10639–10646, 2021.
